# Supplementary material for: Defective GNAS imprinting due to splice site variants in pseudohypoparathyroidism type 1B
Source: JCI journal article supplement (doi:10.1172/jci.insight.194754), 2025-09-02
Supplement: sd1 [file 1]

1 **SUPPLEMENTARY INFORMATION**

2

3 **Methods**

4 **Sex as a biological variable**

5 Sex was not considered as a biological variable in this study.

6

7 **Description of kindred 285**

8 Ages at evaluation, available birth weights, and laboratory data of the affected and unaffected  
9 members of kindred 285 are shown in Figure S1 (Birth weight of patient 285/II-1 was included in  
10 our previous study; previous code, 629 (7)). *GNAS* methylation analysis was performed using  
11 pyrosequencing, as previously described (8).

12

13 **Sequencing and allelic determination of SNVs**

14 Genomic DNA was extracted from peripheral blood leukocytes using a phenol-chloroform  
15 extraction method. Whole-genome sequencing was performed at the Broad Institute, Cambridge,  
16 MA; the FASTQ files were aligned to GRCh38 and visualized on IGV (9). For Sanger sequencing  
17 of the exon H splice donor site and adjacent nucleotide sequences, gDNA was PCR-amplified with  
18 a forward primer (a) in a normally paternally methylated intronic region between exons NESP and  
19 H and a reverse primer (b) telomeric of *GNAS-ASI* exon 3. Primer sequences are provided in Table  
20 S1. For allelic determination of SNVs, gDNA was first incubated with the restriction enzyme  
21 HpaII (37°C, 2 hours), which digests the unmethylated, maternal allele in the exon H region  
22 (Figure S2C). The digested DNA was then PCR-amplified using the same primer set (a and b) for

23 exon H splice site sequencing. All PCR products underwent Sanger sequencing at the MGH DNA  
24 Core.

25

### 26 **Cell culture and genome editing**

27 HESCs (HUES62) were obtained from Harvard Stem Cell Research Institute and maintained in  
28 mTeSR plus medium (StemCell Technologies). Genome editing was performed as we previously  
29 described, with minor modifications (10). Briefly, the gRNA/Cas9-GFP ribonucleoprotein  
30 complex was introduced into hESCs using TransIT X2 (Mirus). Forty-eight hours later, GFP-  
31 positive hESCs were single-cell sorted into 96-well plates using a Bigfoot Cell sorter  
32 (ThermoFisher). Each clone was genotyped by Sanger sequencing at MGH DNA Core. For hESC  
33 clones with on-target genome editing, the parental origin of the edited genome was determined by  
34 Sanger sequencing following HpaII digestion, as outlined above (Figure S2C).

35

### 36 **Exon H minigene assay**

37 The minigene was constructed by inserting two, PCR-amplified genomic regions into pGL4.10  
38 vector (Promega) before the firefly luciferase coding sequence (Figure S2A). Within the inserted  
39 sequence, the upstream amplicon contained the exon H promoter, exon H, and the centromeric end  
40 of the exon H intron. The downstream amplicon contained the telomeric end of exon H intron  
41 (~0.5 kb) and a centromeric half of *GNAS* exon 2. Patient-derived SNVs were introduced by  
42 inverse-PCRs. The entire vector sequences were confirmed by rapid Nanopore plasmid sequencing  
43 at the MGH DNA Core. Plasmids were introduced into hESCs with a SV40-Renilla vector as a  
44 normalization control using Lipofectamine 3000 (ThermoFisher), and 24 h after transfection,

45 luciferase counts were measured by Dual-Glo Luciferase Assay System (Promega) using  
46 ENVISION (PerkinElmer).

47

#### 48 **Transcriptional and methylation analyses of hESCs**

49 Total RNA was extracted using RNeasy Mini (QIAGEN) and reverse-transcribed with oligo dT  
50 primers using ProtoScript II Reverse Transcriptase (New England Biolabs). Exon H transcripts  
51 were amplified by pairing a forward primer within exon H (c) with a reverse primer in *GNAS* exon  
52 13 (d) (Figure 1F) or with a reverse primer inside the firefly luciferase coding cassette (e) (Figure  
53 S2B). Quantitative PCR analysis was performed using KOD SYBR in QuantStudio 3  
54 (ThermoFisher). Forward primers in exon H (c) or *Gsa* exon 1 (f), and a reverse primer in *GNAS*  
55 exon 2 (g) were used, and *ACTB* was used as an endogenous control. Primer sequences are  
56 provided in Table S1.

57 For 3'RACE, total RNA was reverse-transcribed using an oligo dT primer with a tag  
58 sequence (ThermoFisher). Complementary DNA was PCR-amplified with a forward primer within  
59 exon H (c) and a reverse primer within the tag sequence. PCR products were purified using the  
60 QIAquick PCR purification kit (QIAGEN) for amplicon sequencing at the MGH DNA Core.  
61 FASTQ files were aligned to the chromosomal region, GRCh38, chr20:58,841,421-58,881,666,  
62 using BWA-MEM2 on the Galaxy platform (11). BAM files were visualized using IGV (9). In  
63 silico prediction of the effects of SNVs on exon H splicing was performed using SpliceAI (12).

64

#### 65 **Statistics**

66 Statistical analyses were performed using GraphPad Prism 9 software (GraphPad Software). Data  
67 are shown as means  $\pm$  SE from three independent experiments (Fig. 1D) or independent clones

68 (Fig. 1G). Individual data points indicate the average values of technical triplicates. One-way  
69 ANOVA with Tukey's post hoc tests (Fig. 1D) and one-sample t-tests (Fig. 1G) were used for  
70 intergroup comparisons. P values less than 0.05 were considered statistically significant. P values  
71 of 0.05 or higher were labeled as "ns" (i.e., not significant).

72

### 73 **Study approval**

74 All experiments were approved by the MGH IRB (protocol #2001P000648) and Institutional  
75 Biosafety Committee of the Mass General Brigham (#: 2019B000050).

76

### 77 **Data availability:**

78 Data are available in the "Supporting data values" XLS file.

79

### 80 **Author contributions:**

81 Y.I., M.R., M.B., and H.J. designed and conducted experiments; A.M. and M.-L.K. analyzed  
82 clinical samples; Y.I., M.R., M.M., and H.J. analyzed genetic data; and Y.I. and H.J. wrote the  
83 paper with input from coauthors.

84

### 85 **Acknowledgments:**

86 We thank the patients and family members for participating in this study. This work was funded  
87 in whole or in part by the NIH, R01DK046718 (to HJ), R01DK140244 (to MB), and is subject to  
88 the NIH Public Access Policy. Through acceptance of this federal funding, the NIH has been given  
89 a right to make the work publicly available in PubMed Central. This work was also supported by  
90 the International Medical Research Foundation (to YI), the Uehara Memorial Foundation (to YI),

91 the Yamada Science Foundation (to YI), the Cell Science Research Foundation (to YI), and JSPS  
92 KAKENHI grant 19K20170 (to YI).

93

94 **Supplemental References**

95

96 7. Brehin AC, Colson C, Maupetit-Mehouas S, Grybek V, Richard N, Linglart A, et al. Loss  
97 of methylation at GNAS exon A/B is associated with increased intrauterine growth. *J Clin*  
98 *Endocrinol Metab.* 2015;100(4):E623-31.

99 8. Richard N, Abeguile G, Coudray N, Mittre H, Gruchy N, Andrieux J, et al. A new deletion  
100 ablating NESP55 causes loss of maternal imprint of A/B GNAS and autosomal dominant  
101 pseudohypoparathyroidism type Ib. *J Clin Endocrinol Metab.* 2012;97(5):E863-7.

102 9. Thorvaldsdottir H, Robinson JT, and Mesirov JP. Integrative Genomics Viewer (IGV):  
103 high-performance genomics data visualization and exploration. *Brief Bioinform.*  
104 2013;14(2):178-92.

105 10. Iwasaki Y, Reyes M, Jüppner H, and Bastepe M. A biallelically active embryonic enhancer  
106 dictates GNAS imprinting through allele-specific conformations. *Nature Communications.*  
107 2025;16(1):1377.

108 11. Afgan E, Baker D, Batut B, van den Beek M, Bouvier D, Cech M, et al. The Galaxy  
109 platform for accessible, reproducible and collaborative biomedical analyses: 2018 update.  
110 *Nucleic Acids Res.* 2018;46(W1):W537-W44.

111 12. Jaganathan K, Kyriazopoulou Panagiotopoulou S, McRae JF, Darbandi SF, Knowles D, Li  
112 YI, et al. Predicting Splicing from Primary Sequence with Deep Learning. *Cell.*  
113 2019;176(3):535-48 e24.

114

Kindred 285

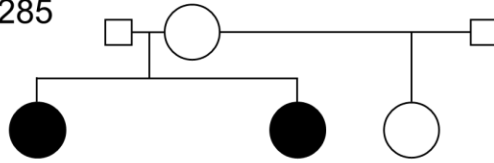

|                   | Normal range             | 285/II-1    | 285/I-2 | 285/II-2    | 285/II-3 |
|-------------------|--------------------------|-------------|---------|-------------|----------|
| Age at evaluation |                          | 10          | 40      | 7           | 27       |
| Ca (mmol/l)       | 2.2-2.6                  | <b>1.95</b> | 2.25    | <b>1.93</b> | 2.39     |
| P (mmol/l)        | 0.8-1.3<br>(adult range) | <b>2.62</b> | 1.06    | <b>2.31</b> | 1.16     |
| PTH (ng/L)        | 12-88                    | <b>856</b>  | 26.6    | <b>826</b>  | 28.9     |
| TSH (mIU/L)       | 0.34-4                   | <b>5</b>    | 2.77    | <b>9.6</b>  | 1.54     |
| Birth weight (g)  |                          | 3720        |         | 3690        |          |

115

116 **Supplemental Figure 1. Clinical and laboratory data for the investigated members of kindred**

117 **285**

118

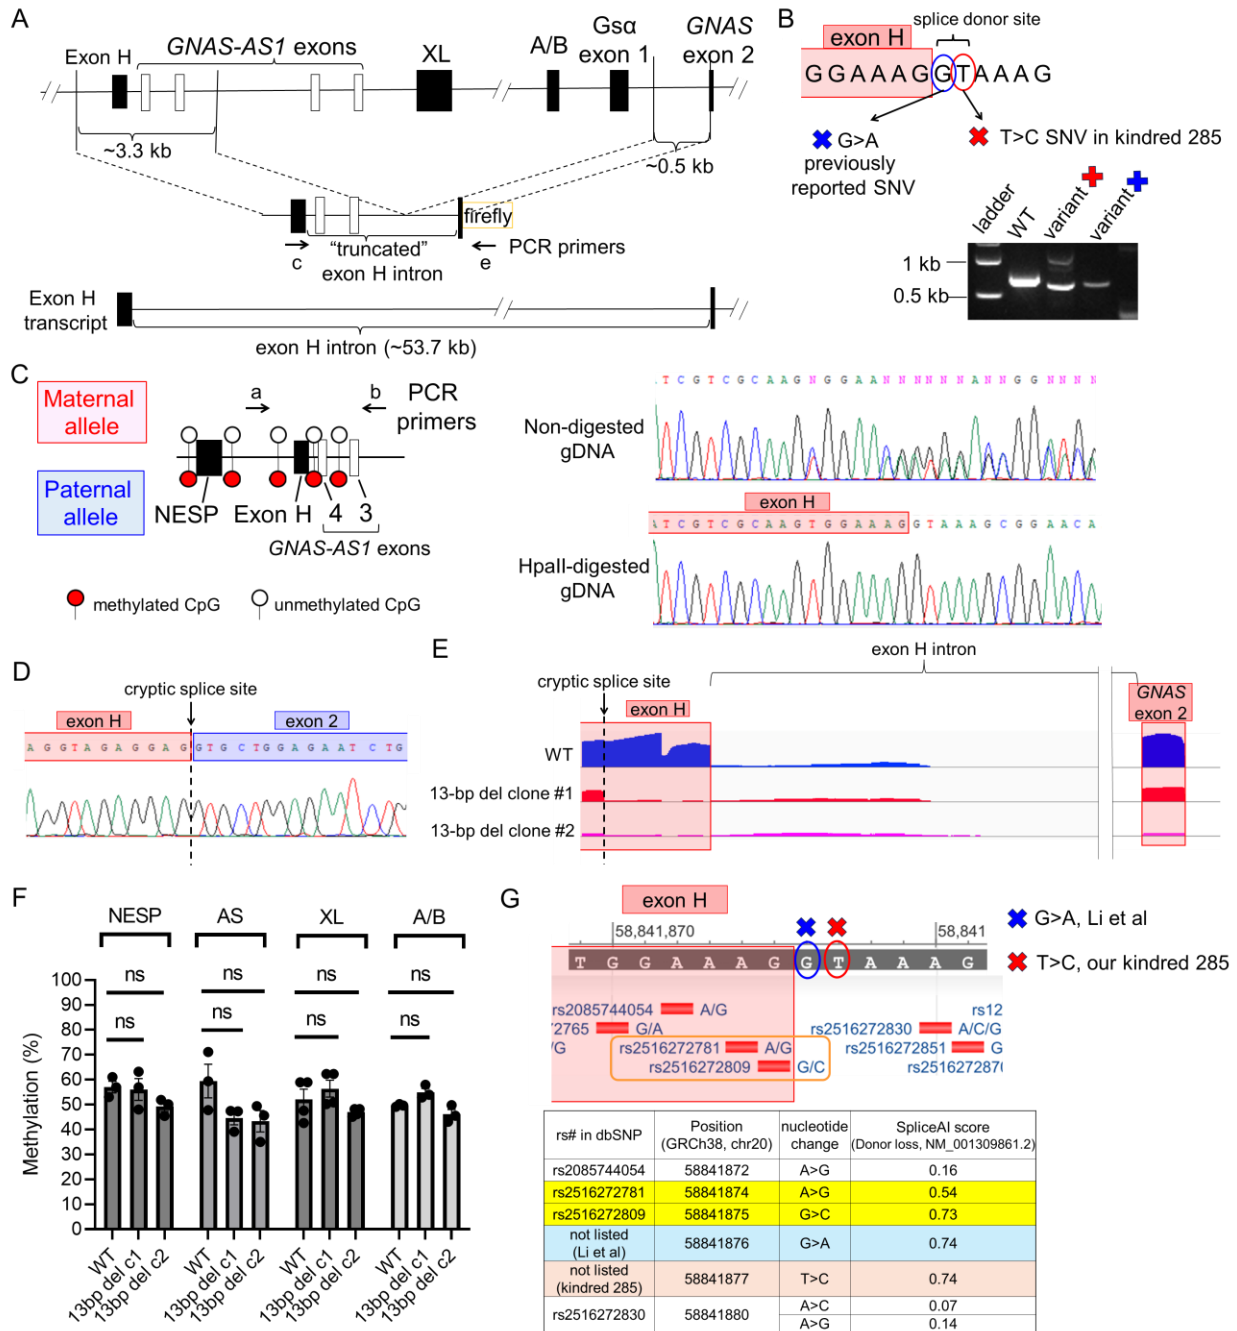

119

120 **Supplemental Figure 2. Supportive data for Figure 1D-H**

121 (A-B) Scheme of the exon H minigene reporter assay. (A) The minigene comprises two ligated  
 122 regions before *GNAS* exon 2 that is fused to the firefly luciferase gene; the upstream portion of  
 123 ~3.3 kb contains the exon H promoter, exon H, and the centromeric end of the exon H intron; the  
 124 downstream portion is the telomeric end of exon H intron (~0.5 kb). (B) RT-PCR analysis of the

125 reporter-derived transcripts using the exon H-specific forward primer and a reverse primer inside  
126 the reporter gene (shown in panel A). The exon H-exon 2 junction in the WT construct was  
127 confirmed by Sanger sequencing.

128 (C) Nucleotide sequence analysis and parental allele determination of the exon H splice site variant  
129 using genomic DNA from the unaffected carrier 285/I-2 or from cell lines with introduced  
130 deletions (related to Figure 1C and E); PCR primer locations (arrows, left); representative PCR-  
131 direct sequencing results of non-digested (right top) and HpaII-digested gDNA (right bottom).  
132 HpaII is a CpG methylation-sensitive restriction enzyme that digests the nonmethylated, maternal  
133 allele of the exon H region; consequently, HpaII-digested gDNA allows only amplification of the  
134 paternal allele.

135 (D) Nucleotide sequence analysis of a PCR product amplified across the cryptic splice site within  
136 exon H of a hESC clone with a 13-bp deletion on the maternal allele (related to Figure 1F).

137 (E) 3'RACE-seq analyses of wild-type (WT) hESCs and two hESC clones with a maternal 13-bp  
138 deletion show coverages of exon H, the upstream/downstream portions of the exon H intron, and  
139 *GNAS* exon 2. In clones with a 13-bp deletion, exon H transcripts were mostly spliced onto Gs $\alpha$   
140 exon 2 using cryptic splice sites.

141 (F) MS-MLPA analyses showing that a maternal 13-bp deletion affecting the exon H splice donor  
142 site did not affect methylation levels at *GNAS* DMRs in hESCs; ns, nonsignificant.

143 (G) (Top) Annotated variants around the exon H splice donor site in the dbSNP database (related  
144 to Figure 1H). (Bottom) In silico prediction of the probability that each SNV affects the splice  
145 donor site by SpliceAI. Minor allele frequency in the global population in the gnomAD v4:  
146 0.000013 for rs2516272781; 0.0000010 for rs2516272809.

147

| Name<br>(see methods) | sequences                 | figure panels used |
|-----------------------|---------------------------|--------------------|
| a                     | TGTGCGGAAAGTAATCTGAATGGG  | Fig. 1C, S2C       |
| b                     | AGCAGGAATTTGACTTAGGGGC    |                    |
| c                     | GCGGTTAGGGGAAAGTACCTGGG   | Fig. 1F, G, S2B    |
| d                     | CACTACTGCTACCCTCATTTACCTG | Fig. 1F            |
| e                     | CGAAGGTGTACATGCTTTGGAAGC  | Fig.S2B            |
| f                     | CAGAAGGACAAGCAGGTCTACC    | Fig. 1G            |
| g                     | CCATTAAACCCATTAACATGCAG   |                    |
| $\beta$ -Actin-Fw     | CACCCAGCACAAATGAAGATC     |                    |
| $\beta$ -Actin-Rv     | GTCATAGTCCGCCTAGAAGC      |                    |

148

149 **Table S1. Primer information**
